# Supplementary material for: Iatrogenic arterial vasospasm during mechanical thrombectomy requiring treatment with intra‐arterial nimodipine might be associated with worse outcomes
Source: PubMed Central journal article supplement — Eur J Neurol. 2024 Sep 9;31(12):e16467. doi: 10.1111/ene.16467 (PMC11554851; doi:10.1111/ene.16467), 2024-09-09
Supplement: ENE-31-e16467-s002.pdf [file ENE-31-e16467-s002.pdf]

## Liste des investigateurs ETIS pour les publications

### **001-Foch**

Bertrand LAPERGUE, Adrien WANG, Arturo CONSOLI, Oguzhan COSKUN, Federico DI MARIA, Silvia PIZZUTO, Alessandro SGRECCIA, Charline BENOIT, Lucas GORZA, David WEISENBURGER-LILE, Waliyde JABEUR, TCHIKVILADZE Maia, Serge EVRARD, Georges RODESCH

### **002-FOR**

Raphaël BLANC, Michel OBADIA, Jean-Philippe DESILLES, Michel PIOTIN, Pierre SENERS, Stanislas SMAJDA, Simon ESCALARD, Benjamin MAIER, Candice SABBEN, Hocine REDJEM, Mikael MAZHIGI, Grace ADWANE, François DELVOYE, Amira AL RAAISI, William BOISSEAU, ALTAYEB Adnan, ROBICHON Erwan

### **003-Lyon**

Omer EKER, Tae-Hee CHO, Laurent DEREK, Julia FONTAINE, Laura MECHTOUFF, Norbert NIGHOGHOSSIAN, Elodie ONG, Lucie RASCLE, Roberto RIVA, François TURJMAN, Morgane LAUBACHER, Mehdi BEYRAGUED, Yves BERTHEZENE, Marc HERMIER, Ameli ROXANNA, Alexandre BANI-SADR, Andrea FILIP, Matteo CAPPUCCI, Laurent DEREK, PERNOT Pierre, CLOTTES Paul

### **004-Nantes**

Romain BOURCIER, Benjamin DAUMAS DUPORT, Pierre Louis ALEXANDRE, Hubert DESAL, Solene DE GAALON, Benoît GUILLON, Cécile PRETERRE, Guillaume TESSIER, Arthur LIONNET

### **005-Nancy**

Benjamin GORY, Lisa HUMBERTJEAN-SELTON, René ANXIONNAT, Anne-Laure DERELLE, Liang LIAO, Emmanuelle SCHMITT, Sophie PLANEL, Sébastien RICHARD, Gioia MIONE, Jean-Christophe LACOUR, Marian DOUARINOU, Emilien MICARD, Bailiang CHEN, Gérard AUDIBERT, Agnès MASSON, Lionel ALB, Marine BEAUMONT, Adriana TABARNA, Marcela VOICU, Grégoire BARTHEL, Iona PODAR, Madalina BREZEANU, Marie REITTER, François ZHU, ANXIONNAT René

### **006-Bordeaux**

Gaultier MARNAT, Jean-Sébastien LIEGEY, Pierre BRIAU, Victoire LYON, Igor SIBON, Xavier BARREAU, Jean PAPAXANTHOS, Jerome BERGE, Sabrina DEBRUXELLES, Stéphane OLINDO, Mathilde POLI, Pauline RENOUE, Sharmila SAGNIER, Thomas TOURDIAS, Thomas COURRET, Malgorzata MILNEROWICZ, François ROUANET, Benoit LEGGHE, Aurelie BOYER, Tristan KERDRAON, Lisa SALEILLE, Laurine BASTARDO

### **007-Montpellier**

Cyril DARGAZANLI, Vincent COSTALAT, CAGNAZZO Federico, Pierre-Henri LEFEVRE, Grégory GASCOU, Quentin VARNIER, François Louis COLLEMICHE, Isabelle MOURAND, Caroline ARQUIZAN, Lucas CORTI, Adrien TER SCHIPHORST, Imad DERRAZ.

### **008-Kremlin Bicêtre**

Laurent SPELLE, Jildaz CAROFF, Christian DENIER, Vanessa CHALUMEAU, Cristian MIHALEA, Nicolas LEGRIS, Augustin OZANNE, Leon IKKA, Olivier CHASSIN, Sophie GALLAS, Laura VENDITTI, Mariana SAROV, Jonathan CORTESE

### **009-Rennes**

Jean-Christophe FERRE, Stephane VANNIER, Maria Veronica LASSALLE, Jean-Yves GAUVRIT, Clément TRACOL, Cécile MALRAIN, Edouard BEAUFRETON, Quentin ALIAS, Julien HISSIER, Maud GUILLEN, François EUGENE ,BOUCHERIT Julien

### **010-Amiens**

Cyril CHIVOT, Audrey COURSELLE, Sandrine CANAPLE, Chantal LAMY, Kevin DELAFORGE, Manuel FERNANDEZ, Jérémie VIAL, Quentin LAFERTE, Xavier DESDOIT

### **011-Brest**

Serge TIMSIT, Aurore JOURDAIN, Jean-Christophe GENTRIC, Julien OGNARD, Dr CHEDDAD EL AOUNI Mourad, Irina VIAKHIREVA, Jordan CORIS, François-Mathias MERRIEN, Denis MARECHAL, Marie BRUGUET, Philippe GOAS,

### **012-Caen**

Marion BOULANGER, Emmanuel TOUZE, Charlotte BARBIER, Romain SCHNECKENBURGER, Julien COGEZ, Sophie GUETTIER, Estelle LA PORTE, Jean BOUCHART, Mohammad ISMAIL

### **013-Limoges**

Charbel MOUNAYER, Aymeric ROUCHAUD, Suzana SALEME, Géraud FORESTIER,

### **014-Pitié-Salpêtrière**

Sonia ALAMOWITCH, Charlotte ROSSO, Sara LEDER, Flore BARONNET, Sophie CROZIER, Anne LEGER, Laure BOTTIN, Sam GHAZANFARI, Marion YGER, Stephen DELORME, Aymeric WITTEWER, Christine VASSILEV, Gaparad GERSCHENFELD, Clémence BLANC, Antonio RAINONE, Frédéric CLARENÇON, Kevin PREMAT, SHOTAREimad, StéphanieLENCK, Nader SOUROUR, ALLARD Julien, CHIARONI Pierre Marie.

### **016-Ste Anne**

Olivier NAGGARA, Guillaume TURC, Wagih BEN HASSEN, Denis TRYSTRAM, Christine RODRIGUEZ-REGENT, FINOANA LAZA-NOMENJANAHARY, Hugo GORTAIS

### **017-Rouen**

Ozlem OZKUL-WERMESTER, Chrysanthi PAPAGIANNAKI, Evelyne MASSARDIER, Aude TRIQUENOT, Margaux LEFEBVRE, Julien BUREL, BASILLE Florian ,Adelya CURADO

### **018-Toulouse**

Alain VIGUIER, Christophe COGNARD, Anne Christine JANUEL, Jean-François ALBUCHER, Lionel CALVIÈRE, Jean-Marc OLIVOT, Nicolas RAPOSO, Fabrice BONNEVILLE, Guillaume BELLANGER, Louis FONTAINE, Philippe TALL, Federico SACCHETTI

### **019-Bayonne**

Frédéric BOURDAIN, Patricia BERNADY, Guillaume BALLAN, Stephanie BANNIER, Emmanuel ELLIE, Olivier FLABEAU, Julia POTENZA, Antoine SOULAGES, Laurent LAGOARDE-SEGOT, Hélène CAILLIEZ, Louis VEUNAC, David HIGUE, Quentin BOURGEOIS-BEAUVAIS

### **020-Vannes**

Anthony LEBRAS, Sarah ADAM, Benoit PEGAT, Arnaud LE GUEN, François CHEDEVILLE, Jérémy JOUAN Rémi ALLIBERT, Alexandre COURTOIS, Lucile LESCOT, Dorothée VIDET, Thibaut LAPOTRE

### **021-Pau**

Johann Sebastian RICHTER, Bruno Thierry BARROSO, Camille DAHAN, Alexis GONNET, Régis HUBRECHT, Zoé LEPINE, Hélène CASTAGNET, Raluca MARASESCU

### **022-Grenoble**

Olivier HECK , Pauline CUISENIER , Olivier DETANTE , Isabelle FAVRE WIKI , Clémentine BONAZ, GARAMBOIS Katia, Loic LEGRIS, Adrian KASTLER, Kamel BOUBAGRA, Corentin BERTHET, Stéphane Charara, Florent LEPILLIET

### **23-Poitiers :**

Victor DUMAS, NEAU Jean Philippe, VELASCO Stéphane, NASR Nathalie.

### **024-Strasbourg**

Valérie WOLFF, Raoul POP, Véronique QUENARDELLE, Valérie LAUER, Irène PIERRE-PAUL, Roxana GHEOCA, Leonard LORANT

### **026-Reims**

Solène MOULIN, HUA Vi Tuan, Paolo PAGANO, Alexandre DOUCET, Christophe GELMINI, Pierre-François MANCEAU, Laurenti PAIUSAN, Isabelle SERRE, Sébastien SOIZE, Thi Ngoc Phuong NGUYEN, Maher SAHNOUN, Nathalie CAUCHETEUX

### **27-Colmar :**

Pablo LEBEDINSKY, Federico BOLOGNINI, Francis VUILLEMET.

### **028-Clermont-Ferrand**

Anna FERRIER, Abderrahim ZERROUG, Ricardo MORENO, Emmanuel CHABERT, Elie LTEIF, Pauline PARIS, Nathalie BOURGOIS, Marie RAQUIN

### **029-Angers**

Anne PASCO-PAPON, Jean Baptiste GIROT, Alderic LECLUSE, Sophie GODARD, Vincent L'ALLINEC, CORFU Alice,

### **030-Tours**

Kevin JANOT, Richard BIBI, Marie GAUDRON, Arnaud BRETONNIERE, Mariam ANNAN, Héroïse IFERGAN, Grégoire BOULOUIS, Marco PASI ,Séverine DEBIAIS, Elisabeth MOLINIER, Denis HERBRETEAU,Fouzi BALA, Clémence HOICHE

### **032-Bar le Duc**

Anthony WIETRICH, Valérie RUCHE, Karine LAVANDIER, Hakim AMARA

### **033-Dijon**

Yannick BEJOT, Brivael LEMOGNE, Frédéric RICOLFI, Laura BAPTISTE, Pierre THOUANT, Gauthier DULOQUIN, Pierre olivier COMBY, Blanc-Labarre Christelle, AMARAL Simon, BERNARD Angélique CHAVENT Adrien, RHAMANI Alan, **CHEVALIER Corinne**

### **034-Besançon**

Guillaume CHARBONNIER, Louise BONNET, Nicolas RAYBAUD, Benjamin BOUAMRA, Thierry MOULIN, Alessandra BIONDI,

### **035 -Versailles**

PICO Fernando, DANO Benjamin, PATCAS Carmen, CHAARI Dhouha, STANCIU Daniela, DUONG Duc Long, HMIDA Intissar, Marie-Laure CHADENAT

### **037- Marseille**

SUISSA Laurent, DOCHÉ Emilie, HAK Jean-François, REYRE Anthony, CARLEXavier, LAKSIRI Nadia, OSMANO phélie, PERES Roxane, ROBINET-BORGMANO Emmanuelle, DULAU Cécile, KERLEROUX Basile, REY Caroline, BRUNEL Hervé DORY-LAUTREC Philippe, HAK Jean-François , LEHMANN Pierre VINGADALASSALOM Sivadji

### **038-BASTIA**

Basile KERLEROUX, Jérôme BERGE, Federico SACCHETTI

### **040-ANNECY**

Fabrice BING, Mathieu BONNEROT, BERGER Isabelle, MOREL Nathalie, RODIER Gilles, VADOT Wilfried
